# Supplementary material for: Association of Adjuvant or Metastatic Setting With Discontinuation of Cancer Drugs in Clinical Trials
Source: PubMed Central journal article supplement — JAMA Netw Open. 2022 May 16;5(5):e2212327. doi: 10.1001/jamanetworkopen.2022.12327 (PMC9112068; doi:10.1001/jamanetworkopen.2022.12327), 2022-05-16
Supplement: jamanetwopen-e2212327-s001.pdf [file jamanetwopen-e2212327-s001.pdf]

## Supplemental Online Content

Ahmed N, Vengalasetti Y, Haslam A, Prasad V. Association of adjuvant or metastatic setting with discontinuation of cancer drugs in clinical trials. *JAMA Netw Open*. 2022;5(5):e2212327. doi:10.1001/jamanetworkopen.2022.12327

**eTable.** Study Trials

**eFigure 1.** Discontinuation Percentages (Adverse Events and Withdrawal) for Drugs in the Metastatic vs Adjuvant Settings, by Drug Type

**eFigure 2.** Discontinuation Percentages (Adverse Events and Withdrawal) for Drugs in the Metastatic vs Adjuvant Settings, by Route of Administration

**eReferences.**

This supplemental material has been provided by the authors to give readers additional information about their work.

**eTable. Study Trials**

| Drug                                         | Tumor               | Adjuvant study                                      | Metastatic Study            |
|----------------------------------------------|---------------------|-----------------------------------------------------|-----------------------------|
| Pembrolizumab                                | Melanoma            | KEYNOTE-054 trial <sup>1</sup>                      | KEYNOTE-006 <sup>2</sup>    |
| Atezolizumab                                 | Urothelial          | IMvigor010 study <sup>3</sup>                       | IMvigor211 <sup>4</sup>     |
| Palbociclib                                  | Breast              | PALLAS trial <sup>5</sup>                           | PALOMA-3 <sup>6</sup>       |
| nivolumab                                    | Melanoma            | CheckMate 238 trial <sup>7</sup>                    | CheckMate 066 <sup>8</sup>  |
| Nivolumab plus ipilimumab                    | Melanoma            | IMMUNED trial <sup>9</sup>                          | CheckMate 069 <sup>10</sup> |
| Imatinib                                     | GIST                | PERSIST-5 Trial <sup>11</sup>                       | No name <sup>12</sup>       |
| Afatinib                                     | SCCHN               | LUX-Head & Neck 2 <sup>13</sup>                     | No name <sup>14</sup>       |
| Olaparib                                     | Breast              | OlympiA <sup>15</sup>                               | OlympiAD <sup>16</sup>      |
| Nivolumab                                    | Gastric             | CheckMate 577 trial <sup>17</sup>                   | CheckMate 649 <sup>18</sup> |
| Nivolumab                                    | Urothelial          | CheckMate 274 <sup>19</sup>                         | CheckMate 275 <sup>20</sup> |
| Osimertinib                                  | NSCLC               | ADAURA <sup>21</sup>                                | FLAURA <sup>22</sup>        |
| Trastuzumab emtansine                        | Breast              | KATHERINE <sup>23</sup>                             | EMILIA <sup>24</sup>        |
| Pertuzumab plus trastuzumab                  | Breast              | APHINITY Trial <sup>25</sup>                        | CLEOPATRA <sup>26</sup>     |
| Abemaciclib                                  | Breast              | monarchE <sup>27</sup>                              | MONARCH 3 <sup>28</sup>     |
| Ipilimumab                                   | Melanoma            | E1609 trial <sup>29</sup>                           | No name <sup>30</sup>       |
| Erlotinib                                    | NSCLC               | SELECT trial <sup>31</sup>                          | EURTAC <sup>32</sup>        |
| Sorafenib                                    | RCC                 | SORCE trial <sup>33</sup>                           | TARGET <sup>34</sup>        |
| Trastuzumab emtansine                        | Breast              | ATEMPT trial <sup>35</sup>                          | EMILIA <sup>24</sup>        |
| Bevacizumab                                  | Breast              | E5103 trial <sup>36</sup>                           | No name <sup>37</sup>       |
| Dabrafenib plus trametinib                   | Melanoma            | COMBI-AD trial <sup>38</sup>                        | COMBI-d <sup>39</sup>       |
| Paclitaxel plus carboplatin                  | Breast              | PATTERN <sup>40</sup>                               | BROCADE3 <sup>41</sup>      |
| Modified FOLFIRINOX regimen with gemcitabine | Pancreatic          | PRODIGE 24–<br>ACCORD <sup>42</sup>                 | No name <sup>43</sup>       |
| Capecitabine                                 | Breast              | GEICAM/2003-<br>11_CIBOMA/2004-<br>01 <sup>44</sup> | No name <sup>45</sup>       |
| Gefitinib                                    | NSCLC               | CTONG1104 <sup>46</sup>                             | WJTOG3405 <sup>47</sup>     |
| Gefitinib                                    | NSCLC               | IMPACT <sup>48</sup>                                | WJTOG3405 <sup>47</sup>     |
| Pemetrexed plus Cisplatin                    | NSCLC               | JIPANG <sup>49</sup>                                | INSPIRE <sup>50</sup>       |
| Carboplatin plus gemcitabine                 | Urothelial          | POUT Trial <sup>51</sup>                            | EORTC 30986 <sup>52</sup>   |
| Irinotecan plus Cisplatin                    | SCLC -<br>extensive | JCOG1205/1206 <sup>53</sup>                         | No name <sup>54</sup>       |
| Irinotecan plus Cisplatin                    | SCLC - limited      | JCOG1205/1206 <sup>53</sup>                         | WJTOG 9902 <sup>55</sup>    |

**eFigure 1.** Discontinuation Percentages (Adverse Events and Withdrawal) for Drugs in the Metastatic vs Adjuvant Settings, by Drug Type

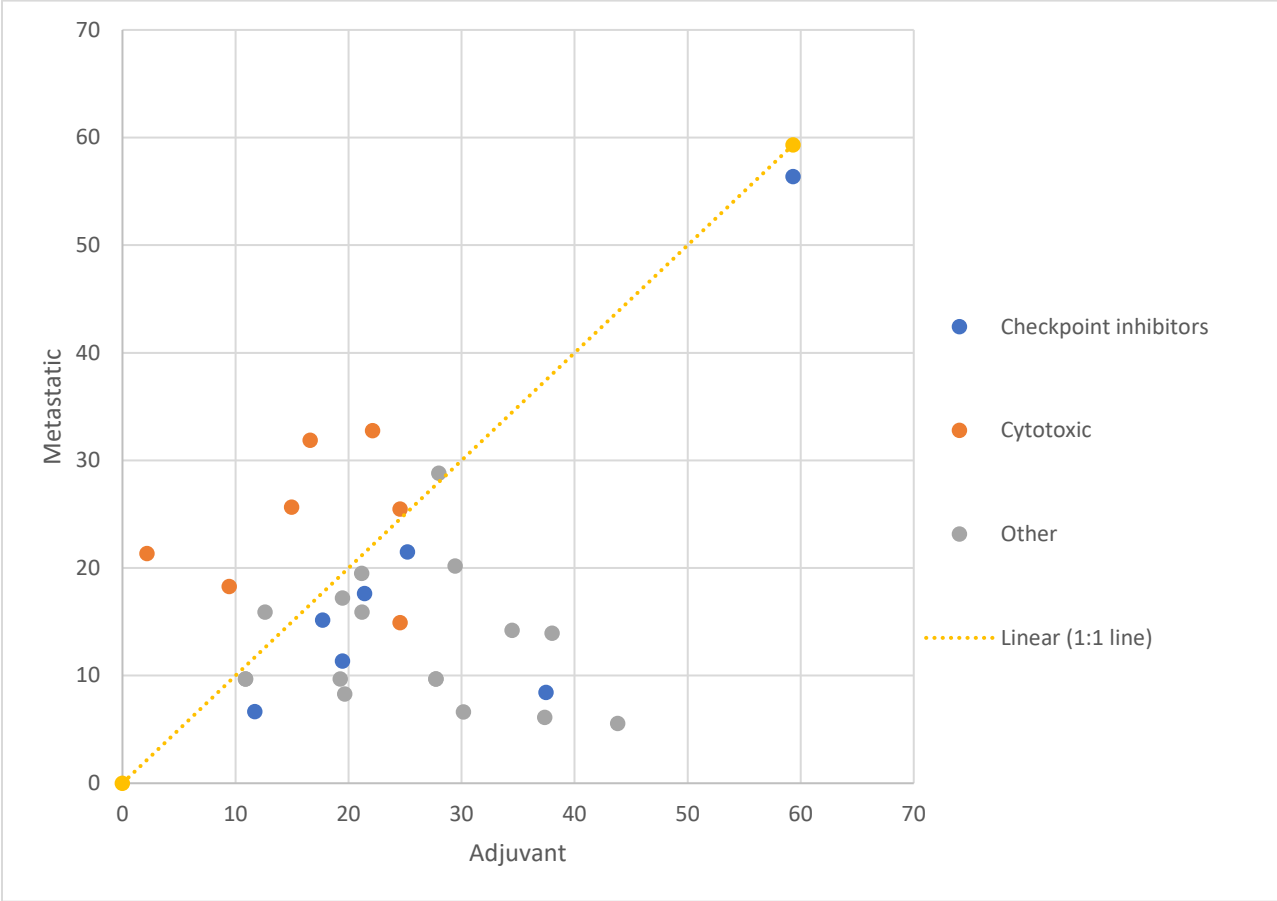

**eFigure 2.** Discontinuation Percentages (Adverse Events and Withdrawal) for Drugs in the Metastatic vs Adjuvant Settings, by Route of Administration

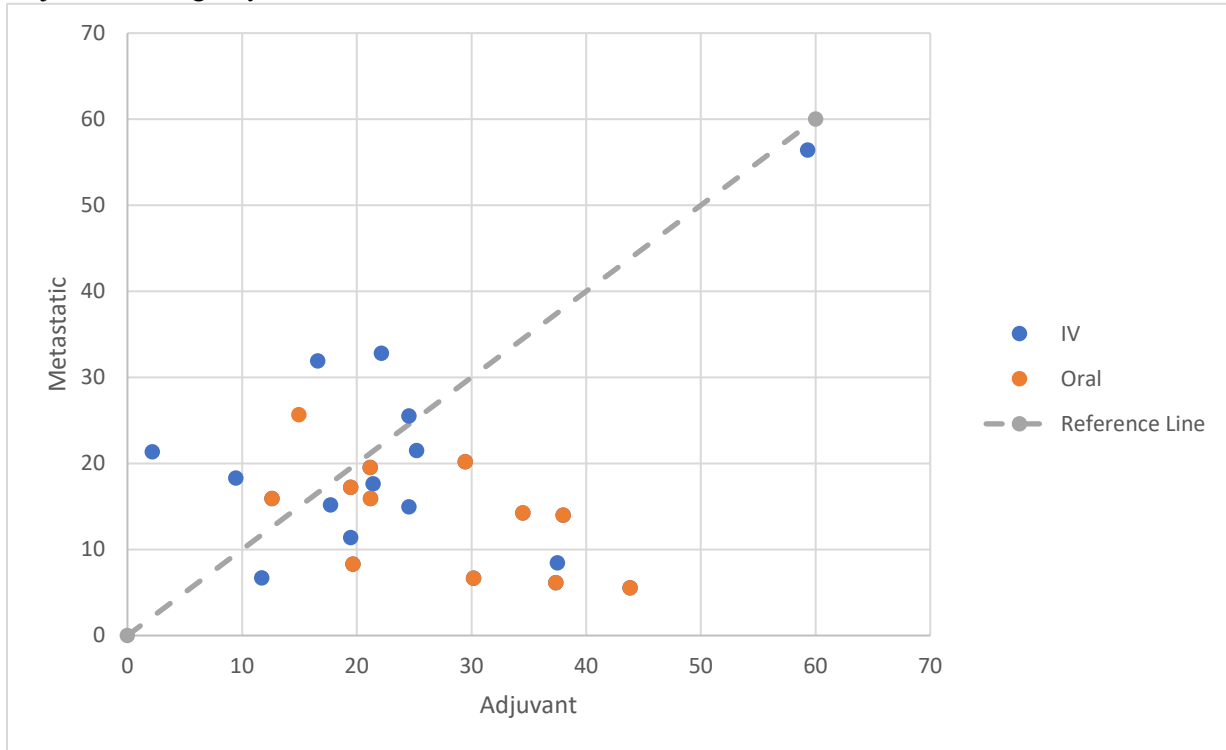

## eReferences.

1. Eggermont AMM, Blank CU, Mandalà M, et al. Adjuvant pembrolizumab versus placebo in resected stage III melanoma (EORTC 1325-MG/KEYNOTE-054): distant metastasis-free survival results from a double-blind, randomised, controlled, phase 3 trial. *Lancet Oncol.* 2021;22(5):643-654. doi: 10.1016/s1470-2045(21)00065-6.
2. Robert C, Schachter J, Long GV, et al. Pembrolizumab versus Ipilimumab in Advanced Melanoma. *New England Journal of Medicine.* 2015;372(26):2521-2532. doi: 10.1056/NEJMoa1503093. Accessed 2021/12/15.
3. Bellmunt J, Hussain M, Gschwend JE, et al. Adjuvant atezolizumab versus observation in muscle-invasive urothelial carcinoma (IMvigor010): a multicentre, open-label, randomised, phase 3 trial. *Lancet Oncol.* 2021;22(4):525-537. doi: 10.1016/s1470-2045(21)00004-8.
4. Powles T, Durán I, van der Heijden MS, et al. Atezolizumab versus chemotherapy in patients with platinum-treated locally advanced or metastatic urothelial carcinoma (IMvigor211): a multicentre, open-label, phase 3 randomised controlled trial. *The Lancet.* 2018;391(10122):748-757. doi: [https://doi.org/10.1016/S0140-6736\(17\)33297-X](https://doi.org/10.1016/S0140-6736(17)33297-X).
5. Mayer EL, Dueck AC, Martin M, et al. Palbociclib with adjuvant endocrine therapy in early breast cancer (PALLAS): interim analysis of a multicentre, open-label, randomised, phase 3 study. *Lancet Oncol.* 2021;22(2):212-222. doi: 10.1016/s1470-2045(20)30642-2.
6. Turner NC, Slamon DJ, Ro J, et al. Overall Survival with Palbociclib and Fulvestrant in Advanced Breast Cancer. *New England Journal of Medicine.* 2018;379(20):1926-1936. doi: 10.1056/NEJMoa1810527. Accessed 2021/12/15.
7. Ascierto PA, Del Vecchio M, Mandalá M, et al. Adjuvant nivolumab versus ipilimumab in resected stage IIIB-C and stage IV melanoma (CheckMate 238): 4-year results from a multicentre, double-blind, randomised, controlled, phase 3 trial. *Lancet Oncol.* 2020;21(11):1465-1477. doi: 10.1016/s1470-2045(20)30494-0.
8. Robert C, Long GV, Brady B, et al. Nivolumab in Previously Untreated Melanoma without BRAF Mutation. *New England Journal of Medicine.* 2014;372(4):320-330. doi: 10.1056/NEJMoa1412082. Accessed 2021/12/15.
9. Zimmer L, Livingstone E, Hassel JC, et al. Adjuvant nivolumab plus ipilimumab or nivolumab monotherapy versus placebo in patients with resected stage IV melanoma with no evidence of disease (IMMUNED): a randomised, double-blind, placebo-controlled, phase 2 trial. *Lancet.* 2020;395(10236):1558-1568. doi: 10.1016/s0140-6736(20)30417-7.
10. Postow MA, Chesney J, Pavlick AC, et al. Nivolumab and Ipilimumab versus Ipilimumab in Untreated Melanoma. *New England Journal of Medicine.* 2015;372(21):2006-2017. doi: 10.1056/NEJMoa1414428. Accessed 2021/12/15.
11. Raut CP, Espot NJ, Maki RG, et al. Efficacy and Tolerability of 5-Year Adjuvant Imatinib Treatment for Patients With Resected Intermediate- or High-Risk Primary Gastrointestinal Stromal Tumor: The PERSIST-5 Clinical Trial. *JAMA Oncology.* 2018;4(12):e184060-e184060. doi: 10.1001/jamaoncol.2018.4060. Accessed 12/14/2021.
12. Verweij J, Casali PG, Zalcberg J, et al. Progression-free survival in gastrointestinal stromal tumours with high-dose imatinib: randomised trial. *Lancet.* 2004;364(9440):1127-1134. doi: 10.1016/s0140-6736(04)17098-0.
13. Burtneß B, Haddad R, Dinis J, et al. Afatinib vs Placebo as Adjuvant Therapy After Chemoradiotherapy in Squamous Cell Carcinoma of the Head and Neck: A Randomized Clinical

- Trial. *JAMA Oncology*. 2019;5(8):1170-1180. doi: 10.1001/jamaoncol.2019.1146. Accessed 12/14/2021.
14. Seiwert TY, Fayette J, Cupissol D, et al. A randomized, phase II study of afatinib versus cetuximab in metastatic or recurrent squamous cell carcinoma of the head and neck†. *Annals of Oncology*. 2014;25(9):1813-1820. doi: <https://doi.org/10.1093/annonc/mdu216>.
  15. Tutt ANJ, Garber JE, Kaufman B, et al. Adjuvant Olaparib for Patients with BRCA1- or BRCA2-Mutated Breast Cancer. *N Engl J Med*. 2021;384(25):2394-2405. doi: 10.1056/NEJMoa2105215.
  16. Robson M, Im S-A, Senkus E, et al. Olaparib for Metastatic Breast Cancer in Patients with a Germline BRCA Mutation. *New England Journal of Medicine*. 2017;377(6):523-533. doi: 10.1056/NEJMoa1706450. Accessed 2021/12/15.
  17. Kelly RJ, Ajani JA, Kuzdzal J, et al. Adjuvant Nivolumab in Resected Esophageal or Gastroesophageal Junction Cancer. *New England Journal of Medicine*. 2021;384(13):1191-1203. doi: 10.1056/NEJMoa2032125. Accessed 2021/12/14.
  18. Janjigian YY, Shitara K, Moehler M, et al. First-line nivolumab plus chemotherapy versus chemotherapy alone for advanced gastric, gastro-oesophageal junction, and oesophageal adenocarcinoma (CheckMate 649): a randomised, open-label, phase 3 trial. *Lancet*. 2021;398(10294):27-40. doi: 10.1016/s0140-6736(21)00797-2.
  19. Bajorin DF, Witjes JA, Gschwend JE, et al. Adjuvant Nivolumab versus Placebo in Muscle-Invasive Urothelial Carcinoma. *New England Journal of Medicine*. 2021;384(22):2102-2114. doi: 10.1056/NEJMoa2034442. Accessed 2021/12/14.
  20. Sharma P, Retz M, Siefker-Radtke A, et al. Nivolumab in metastatic urothelial carcinoma after platinum therapy (CheckMate 275): a multicentre, single-arm, phase 2 trial. *The Lancet Oncology*. 2017;18(3):312-322. doi: [https://doi.org/10.1016/S1470-2045\(17\)30065-7](https://doi.org/10.1016/S1470-2045(17)30065-7).
  21. Wu Y-L, Tsuboi M, He J, et al. Osimertinib in Resected EGFR-Mutated Non-Small-Cell Lung Cancer. *New England Journal of Medicine*. 2020;383(18):1711-1723. doi: 10.1056/NEJMoa2027071. Accessed 2021/12/14.
  22. Soria JC, Ohe Y, Vansteenkiste J, et al. Osimertinib in Untreated EGFR-Mutated Advanced Non-Small-Cell Lung Cancer. *N Engl J Med*. 2018;378(2):113-125. doi: 10.1056/NEJMoa1713137.
  23. von Minckwitz G, Huang C-S, Mano MS, et al. Trastuzumab Emtansine for Residual Invasive HER2-Positive Breast Cancer. *New England Journal of Medicine*. 2018;380(7):617-628. doi: 10.1056/NEJMoa1814017. Accessed 2021/12/14.
  24. Verma S, Miles D, Gianni L, et al. Trastuzumab Emtansine for HER2-Positive Advanced Breast Cancer. *New England Journal of Medicine*. 2012;367(19):1783-1791. doi: 10.1056/NEJMoa1209124. Accessed 2021/12/15.
  25. Piccart M, Procter M, Fumagalli D, et al. Adjuvant Pertuzumab and Trastuzumab in Early HER2-Positive Breast Cancer in the APHINITY Trial: 6 Years' Follow-Up. *Journal of Clinical Oncology*. 2021;39(13):1448-1457. doi: 10.1200/JCO.20.01204. Accessed 2021/12/14.
  26. Baselga J, Cortés J, Kim S-B, et al. Pertuzumab plus Trastuzumab plus Docetaxel for Metastatic Breast Cancer. *New England Journal of Medicine*. 2011;366(2):109-119. doi: 10.1056/NEJMoa1113216. Accessed 2021/12/15.
  27. Johnston SRD, Harbeck N, Hegg R, et al. Abemaciclib Combined With Endocrine Therapy for the Adjuvant Treatment of HR+, HER2-, Node-Positive, High-Risk, Early Breast Cancer (monarchE). *Journal of Clinical Oncology*. 2020;38(34):3987-3998. doi: 10.1200/JCO.20.02514. Accessed 2021/12/14.
  28. Goetz MP, Toi M, Campone M, et al. MONARCH 3: Abemaciclib As Initial Therapy for Advanced Breast Cancer. *Journal of Clinical Oncology*. 2017;35(32):3638-3646. doi: 10.1200/JCO.2017.75.6155. Accessed 2021/12/15.

29. Tarhini AA, Lee SJ, Hodi FS, et al. Phase III Study of Adjuvant Ipilimumab (3 or 10 mg/kg) Versus High-Dose Interferon Alfa-2b for Resected High-Risk Melanoma: North American Intergroup E1609. *Journal of Clinical Oncology*. 2019;38(6):567-575. doi: 10.1200/JCO.19.01381. Accessed 2021/12/14.
30. Hodi FS, O'Day SJ, McDermott DF, et al. Improved Survival with Ipilimumab in Patients with Metastatic Melanoma. *New England Journal of Medicine*. 2010;363(8):711-723. doi: 10.1056/NEJMoa1003466. Accessed 2021/12/15.
31. Pennell NA, Neal JW, Chaft JE, et al. SELECT: A Phase II Trial of Adjuvant Erlotinib in Patients With Resected Epidermal Growth Factor Receptor–Mutant Non–Small-Cell Lung Cancer. *Journal of Clinical Oncology*. 2018;37(2):97-104. doi: 10.1200/JCO.18.00131. Accessed 2021/12/14.
32. Rosell R, Carcereny E, Gervais R, et al. Erlotinib versus standard chemotherapy as first-line treatment for European patients with advanced EGFR mutation-positive non-small-cell lung cancer (EURTAC): a multicentre, open-label, randomised phase 3 trial. *The Lancet Oncology*. 2012;13(3):239-246. doi: [https://doi.org/10.1016/S1470-2045\(11\)70393-X](https://doi.org/10.1016/S1470-2045(11)70393-X).
33. Eisen T, Frangou E, Oza B, et al. Adjuvant Sorafenib for Renal Cell Carcinoma at Intermediate or High Risk of Relapse: Results From the SORCE Randomized Phase III Intergroup Trial. *Journal of Clinical Oncology*. 2020;38(34):4064-4075. doi: 10.1200/JCO.20.01800. Accessed 2021/12/14.
34. Escudier B, Eisen T, Stadler WM, et al. Sorafenib in Advanced Clear-Cell Renal-Cell Carcinoma. *New England Journal of Medicine*. 2007;356(2):125-134. doi: 10.1056/NEJMoa060655. Accessed 2021/12/15.
35. Tolaney SM, Tayob N, Dang C, et al. Adjuvant Trastuzumab Emtansine Versus Paclitaxel in Combination With Trastuzumab for Stage I HER2-Positive Breast Cancer (ATEMPT): A Randomized Clinical Trial. *Journal of Clinical Oncology*. 2021;39(21):2375-2385. doi: 10.1200/JCO.20.03398. Accessed 2021/12/14.
36. Miller KD, O'Neill A, Gradishar W, et al. Double-Blind Phase III Trial of Adjuvant Chemotherapy With and Without Bevacizumab in Patients With Lymph Node–Positive and High-Risk Lymph Node–Negative Breast Cancer (E5103). *Journal of Clinical Oncology*. 2018;36(25):2621-2629. doi: 10.1200/JCO.2018.79.2028. Accessed 2021/12/14.
37. Miller K, Wang M, Gralow J, et al. Paclitaxel plus Bevacizumab versus Paclitaxel Alone for Metastatic Breast Cancer. *New England Journal of Medicine*. 2007;357(26):2666-2676. doi: 10.1056/NEJMoa072113. Accessed 2021/12/15.
38. Hauschild A, Dummer R, Schadendorf D, et al. Longer Follow-Up Confirms Relapse-Free Survival Benefit With Adjuvant Dabrafenib Plus Trametinib in Patients With Resected BRAF V600–Mutant Stage III Melanoma. *Journal of Clinical Oncology*. 2018;36(35):3441-3449. doi: 10.1200/JCO.18.01219. Accessed 2021/12/14.
39. Long GV, Stroyakovskiy D, Gogas H, et al. Combined BRAF and MEK Inhibition versus BRAF Inhibition Alone in Melanoma. *New England Journal of Medicine*. 2014;371(20):1877-1888. doi: 10.1056/NEJMoa1406037. Accessed 2021/12/15.
40. Yu K-D, Ye F-G, He M, et al. Effect of Adjuvant Paclitaxel and Carboplatin on Survival in Women With Triple-Negative Breast Cancer: A Phase 3 Randomized Clinical Trial. *JAMA Oncology*. 2020;6(9):1390-1396. doi: 10.1001/jamaoncol.2020.2965. Accessed 12/16/2021.
41. Diéras V, Han HS, Kaufman B, et al. Veliparib with carboplatin and paclitaxel in BRCA-mutated advanced breast cancer (BROCADE3): a randomised, double-blind, placebo-controlled, phase 3 trial. *The Lancet Oncology*. 2020;21(10):1269-1282. doi: [https://doi.org/10.1016/S1470-2045\(20\)30447-2](https://doi.org/10.1016/S1470-2045(20)30447-2).
42. Conroy T, Hammel P, Hebbar M, et al. FOLFIRINOX or Gemcitabine as Adjuvant Therapy for Pancreatic Cancer. *New England Journal of Medicine*. 2018;379(25):2395-2406. doi: 10.1056/NEJMoa1809775. Accessed 2021/12/15.

43. Ozaka M, Ishii H, Sato T, et al. A phase II study of modified FOLFIRINOX for chemotherapy-naïve patients with metastatic pancreatic cancer. *Cancer Chemotherapy and Pharmacology*. 2018;81(6):1017-1023. doi: 10.1007/s00280-018-3577-9.
44. Lluch A, Barrios CH, Torrecillas L, et al. Phase III Trial of Adjuvant Capecitabine After Standard Neo-/Adjuvant Chemotherapy in Patients With Early Triple-Negative Breast Cancer (GEICAM/2003-11\_CIBOMA/2004-01). *Journal of Clinical Oncology*. 2019;38(3):203-213. doi: 10.1200/JCO.19.00904. Accessed 2021/12/15.
45. Sparano JA, Vrdoljak E, Rixe O, et al. Randomized phase III trial of ixabepilone plus capecitabine versus capecitabine in patients with metastatic breast cancer previously treated with an anthracycline and a taxane. *Journal of clinical oncology : official journal of the American Society of Clinical Oncology*. 2010;28(20):3256-3263. doi: 10.1200/JCO.2009.24.4244.
46. Zhong W-Z, Wang Q, Mao W-M, et al. Gefitinib Versus Vinorelbine Plus Cisplatin as Adjuvant Treatment for Stage II-III A (N1-N2) EGFR-Mutant NSCLC: Final Overall Survival Analysis of CTONG1104 Phase III Trial. *Journal of Clinical Oncology*. 2020;39(7):713-722. doi: 10.1200/JCO.20.01820. Accessed 2021/12/15.
47. Mitsudomi T, Morita S, Yatabe Y, et al. Gefitinib versus cisplatin plus docetaxel in patients with non-small-cell lung cancer harbouring mutations of the epidermal growth factor receptor (WJTOG3405): an open label, randomised phase 3 trial. *Lancet Oncol*. 2010;11(2):121-128. doi: 10.1016/s1470-2045(09)70364-x.
48. Tada H, Mitsudomi T, Misumi T, et al. Randomized Phase III Study of Gefitinib Versus Cisplatin Plus Vinorelbine for Patients With Resected Stage II-III A Non-Small-Cell Lung Cancer With EGFR Mutation (IMPACT). *Journal of Clinical Oncology*. 2021;JCO.21.01729. doi: 10.1200/JCO.21.01729. Accessed 2021/12/15.
49. Kenmotsu H, Yamamoto N, Yamanaka T, et al. Randomized Phase III Study of Pemetrexed Plus Cisplatin Versus Vinorelbine Plus Cisplatin for Completely Resected Stage II to III A Nonsquamous Non-Small-Cell Lung Cancer. *Journal of Clinical Oncology*. 2020;38(19):2187-2196. doi: 10.1200/JCO.19.02674. Accessed 2021/12/15.
50. Paz-Ares L, Mezger J, Ciuleanu TE, et al. Necitumumab plus pemetrexed and cisplatin as first-line therapy in patients with stage IV non-squamous non-small-cell lung cancer (INSPIRE): an open-label, randomised, controlled phase 3 study. *Lancet Oncol*. 2015;16(3):328-337. doi: 10.1016/s1470-2045(15)70046-x.
51. Birtle A, Johnson M, Chester J, et al. Adjuvant chemotherapy in upper tract urothelial carcinoma (the POUT trial): a phase 3, open-label, randomised controlled trial. *Lancet*. 2020;395(10232):1268-1277. doi: 10.1016/s0140-6736(20)30415-3.
52. De Santis M, Bellmunt J, Mead G, et al. Randomized phase II/III trial assessing gemcitabine/carboplatin and methotrexate/carboplatin/vinblastine in patients with advanced urothelial cancer who are unfit for cisplatin-based chemotherapy: EORTC study 30986. *Journal of clinical oncology : official journal of the American Society of Clinical Oncology*. 2012;30(2):191-199. doi: 10.1200/JCO.2011.37.3571.
53. Kenmotsu H, Niho S, Tsuboi M, et al. Randomized Phase III Study of Irinotecan Plus Cisplatin Versus Etoposide Plus Cisplatin for Completely Resected High-Grade Neuroendocrine Carcinoma of the Lung: JCOG1205/1206. *Journal of Clinical Oncology*. 2020;38(36):4292-4301. doi: 10.1200/JCO.20.01806. Accessed 2021/12/15.
54. Hanna N, Bunn PA, Langer C, et al. Randomized Phase III Trial Comparing Irinotecan/Cisplatin With Etoposide/Cisplatin in Patients With Previously Untreated Extensive-Stage Disease Small-Cell Lung Cancer. *Journal of Clinical Oncology*. 2006;24(13):2038-2043. doi: 10.1200/JCO.2005.04.8595. Accessed 2021/12/15.



55. Saito H, Takada Y, Ichinose Y, et al. Phase II Study of Etoposide and Cisplatin With Concurrent Twice-Daily Thoracic Radiotherapy Followed by Irinotecan and Cisplatin in Patients With Limited-Disease Small-Cell Lung Cancer: West Japan Thoracic Oncology Group 9902. *Journal of Clinical Oncology*. 2006;24(33):5247-5252. doi: 10.1200/JCO.2006.07.1605. Accessed 2021/12/15.
